# Supplementary material for: Congenital adrenal hyperplasia in children – a survey on the current practice in the UK
Source: publisher site journal article supplement (doi:10.1515/jpem-2014-0362), 2015-01-01
Supplement: Supplementary file 1 [file jpem-2014-0362.docx]

Appendix 1: Survey questionnaire that was sent to the members of the BSPED

National Survey on the management of CAH(Congenital Adrenal Hyperplasia) in children

1. Name of Hospital

*

2. What type of Paediatric Endocrinology service do you have in your hospital?

| 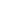DGH having Paediatrician with special interest in Endocrinology  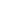DGH with no Paediatric Endocrinology special interest  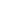DGH with Tertiary Paediatric endocrine service  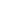Tertiary Paediatric endocrine service |
| --- |

3. Do you have an

| 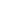Auxologist | 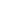Endocrine nurse | 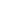Both | 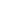None |
| --- | --- | --- | --- |

*

4. Do you manage children with CAH(Congenital Adrenal Hyperplasia)?

| 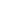Yes  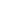No |
| --- |
| If Yes -how many patients do you have in your unit |

*

5. If Yes , how do you manage them?

| 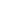Independantly  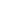Joint care with the tertiary unit |
| --- |

6. If no, when do you refer them?

| At diagnosis |  |
| --- | --- |
| Other- clarify |  |

*

7. If yes- How often do you see them in clinic?

| 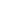3monthly  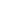4monthly | 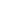6monthly  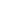1 yearly |
| --- | --- |
| Do they get genetic testing at diagnosis to confirm the enzyme defect? | | |

*

8. Frequency and type of investigations at follow up

|  | 17-OH progesterone | Renin/aldosterone | Testosterone/DHEAS | Bone age |
| --- | --- | --- | --- | --- |
| 6 monthly | 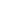*Frequency and type of investigations at follow up 6 monthly 17-OH progesterone | 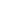6 monthly Renin/aldosterone | 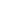6 monthly Testosterone/DHEAS | 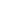6 monthly Bone age |
| 1 yearly | 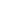1 yearly 17-OH progesterone | 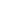1 yearly Renin/aldosterone | 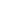1 yearly Testosterone/DHEAS | 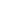1 yearly Bone age |
| Not monitored | 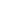Not monitored 17-OH progesterone | 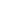Not monitored Renin/aldosterone | 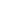Not monitored Testosterone/DHEAS | 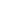Not monitored Bone age |

*

9. Usual dose of Medication

| Hydrocortisone( mg/m2/day) |  |
| --- | --- |
| Fludrocortisone (micrograms) |  |
| Indication for change of medication |  |

10. Involvement of other specialist

|  | Frequency the family are seen |
| --- | --- |
| Psychologist |  |
| Geneticist |  |
| Surgeons |  |
